# Supplementary material
Source: publisher site journal article supplement (https://www.spandidos-publications.com/4184/downloadSupplementary)
Supplement: Supplementary file 1 [file downloadSupplementary]

## Sheet: Sheet1
Table SIII. MiRNAs targeted the expressed genes.
test_id	gene	sample_1	sample_2	value_1	value_2	log2(fold_change)	test_stat	p_value	q_value	significant	regulated	Discription	KEGG ID	GO ID
ENSRNOG00000001001	Retn	S01	S02	0	3.84072	inf	nan	5e-05	0.0185	yes	upreguated	resistin [Source:RGD Symbol;Acc:628781]		GO:0005634, GO:0005615, GO:0007568, GO:0014911, GO:0009612, GO:0005179, GO:0048661, GO:0045444, GO:0032868, GO:0050806, GO:2000252, GO:2000872, GO:0010714
ENSRNOG00000001469	Eln	S01	S02	35.425	115.424	1.70411	5.9121	5e-05	0.0185	yes	upreguated	elastin [Source:RGD Symbol;Acc:67394]	rno:25043	GO:0005201, GO:0005578, GO:0071953, GO:0043149, GO:0050840, GO:0030833, GO:0007519, GO:0030198, GO:0005739, GO:0005515
ENSRNOG00000001528	Gap43	S01	S02	16.1408	5.16205	-1.6447	-4.37191	0.0001	0.0329636	yes	downregulated	growth associated protein 43 [Source:RGD Symbol;Acc:62071]	rno:29423	GO:0005737, GO:0030054, GO:0005516, GO:0007399, GO:0014069, GO:0030426, GO:0042246, GO:0001786, GO:0040008, GO:0061564, GO:0031527, GO:0032584, GO:0035727, GO:1901981, GO:0016198, GO:0010001, GO:0045165, GO:0007411, GO:0014069, GO:0030424, GO:0071944, GO:0005737, GO:0005886, GO:0005515, GO:0051489
ENSRNOG00000001859	Sdf2l1	S01	S02	98.1487	43.4855	-1.17444	-3.9894	0.00015	0.0460932	yes	downregulated	stromal cell-derived factor 2-like 1 [Source:RGD Symbol;Acc:1585844]	rno:680945	GO:0007275, GO:0016020, GO:0042981, GO:0005783, GO:0051087, GO:0051117, GO:0034976, GO:0071218, GO:0035269, GO:0000032, GO:0031502, GO:0044845, GO:1900101, GO:0004169, GO:0051787, GO:0071712, GO:0034663
ENSRNOG00000002052	Ccdc80	S01	S02	11.3709	29.7008	1.38515	4.73672	5e-05	0.0185	yes	upreguated	coiled-coil domain containing 80 [Source:RGD Symbol;Acc:69421]	rno:64387	GO:0016337, GO:0001525, GO:0048870, GO:0005539, GO:0001968, GO:0010811, GO:0005614, GO:0005578, GO:0030198, GO:0008201, GO:0005604
ENSRNOG00000002116	LOC100911575	S01	S02	7.15658	0	#NAME?	nan	0.0001	0.0329636	yes	downregulated	60S acidic ribosomal protein P2-like [Source:RGD Symbol;Acc:6491911]		GO:0003735, GO:0005506, GO:0043021, GO:0045727, GO:0071320, GO:0006414, GO:0002181, GO:0030687, GO:0022625, GO:0070180, GO:1904401
ENSRNOG00000002548	Tnn	S01	S02	1.02573	7.27505	2.82631	6.92884	5e-05	0.0185	yes	upreguated	tenascin N [Source:RGD Symbol;Acc:1306002]	rno:304913	GO:0016477, GO:0009986, GO:0042802, GO:0007160, GO:0005578, GO:0007409, GO:0005178, GO:0016049
ENSRNOG00000004659	Creld2	S01	S02	75.1963	27.8428	-1.43336	-4.79894	5e-05	0.0185	yes	downregulated	cysteine-rich with EGF-like domains 2 [Source:RGD Symbol;Acc:1310614]	rno:362978	GO:0005509, GO:0005783, GO:0005794, GO:0005615, GO:0005515
ENSRNOG00000014779	Pdcd4	S01	S02	37.6513	93.5393	1.31287	4.56406	5e-05	0.0185	yes	upreguated	programmed cell death 4 [Source:RGD Symbol;Acc:620816]	rno:64031	GO:0005634, GO:0005634, GO:0005737, GO:0003674, GO:0005575, GO:0005829, GO:0006915, GO:0045892, GO:0003723, GO:0043066, GO:0043508, GO:0007569, GO:0034393, GO:0051246, GO:0005515, GO:0005737, GO:0005634, GO:0005829, GO:0045892, GO:0005654, GO:0007569, GO:1904761
ENSRNOG00000012237	Rdx	S01	S02	22.1366	4.78153	-2.21089	-4.85701	5e-05	0.0185	yes	downregulated	radixin [Source:RGD Symbol;Acc:1359472]		GO:0005737, GO:0005886, GO:0005856, GO:0003779, GO:0019898, GO:0036120, GO:0030496, GO:0005913, GO:0005902, GO:0030315, GO:0032154, GO:0045176, GO:0051016, GO:0051286
ENSRNOG00000006365	Asb15	S01	S02	0.892794	4.37481	2.29282	4.8584	5e-05	0.0185	yes	upreguated	ankyrin repeat and SOCS box containing 15 [Source:RGD Symbol;Acc:727860]		GO:0005622, GO:0016567, GO:0035556
ENSRNOG00000000786	p21	S01	S02	131.272	52.8938	-1.31138	-4.51616	5e-05	0.0185	yes	downregulated	P/MRP 21 subunit [Source:RGD Symbol;Acc:1303090]		GO:0003674, GO:0005575, GO:0008150
ENSRNOG00000009005	Slco2a1	S01	S02	4.48368	12.4173	1.46959	4.45738	5e-05	0.0185	yes	upreguated	solute carrier organic anion transporter family, member 2a1 [Source:RGD Symbol;Acc:3051]		GO:0016021, GO:0005215, GO:0005886, GO:0006811
ENSRNOG00000009227	Aplnr	S01	S02	5.37441	13.9088	1.37182	4.19351	5e-05	0.0185	yes	upreguated	apelin receptor [Source:RGD Symbol;Acc:621645]	rno:83518	GO:0016021, GO:0007186, GO:0016020, GO:0004930, GO:0005886, GO:0007507, GO:0042277, GO:0050878, GO:0007369
ENSRNOG00000009450	Hcn4	S01	S02	1.72161	4.81222	1.48295	4.04687	5e-05	0.0185	yes	upreguated	hyperpolarization activated cyclic nucleotide-gated potassium channel 4 [Source:RGD Symbol;Acc:71065]	rno:59266	GO:0016021, GO:0060078, GO:0030552, GO:0005249, GO:0071805, GO:0005886, GO:0042802, GO:0048471, GO:0035725, GO:0031226, GO:0042391, GO:0071321, GO:0002027, GO:0055117, GO:0071320, GO:0086015, GO:0086091, GO:0005222, GO:0005248, GO:0006812, GO:0003254
ENSRNOG00000010478	LOC299282	S01	S02	2.6049	62.1377	4.57617	11.2494	5e-05	0.0185	yes	upreguated	Serine protease inhibitor [Source:RGD Symbol;Acc:3745]		, GO:0005615, GO:0005615, GO:0005615, GO:0005615, GO:0005615
ENSRNOG00000010805	Fabp4	S01	S02	32.6662	126.343	1.95147	5.95783	5e-05	0.0185	yes	upreguated	fatty acid binding protein 4 [Source:RGD Symbol;Acc:69309]		GO:0005215, GO:0006810, GO:0005504, GO:0050727
ENSRNOG00000011648	Aqp1	S01	S02	20.1101	49.4552	1.2982	4.41268	5e-05	0.0185	yes	upreguated	aquaporin 1 [Source:RGD Symbol;Acc:2141]	rno:25240	GO:0005634, GO:0005737, GO:0005515, GO:0071300, GO:0005886, GO:0071456, GO:0005887, GO:0071805, GO:0043066, GO:0042493, GO:0043005, GO:0070301, GO:0005223, GO:0048146, GO:0043627, GO:0071549, GO:0009725, GO:0006884, GO:0016324, GO:0006833, GO:0010634, GO:0043679, GO:0071260, GO:0006182, GO:0071320, GO:0031526, GO:0008519, GO:0008519, GO:0072488, GO:0045766, GO:0042383, GO:0021670, GO:0005267, GO:…
ENSRNOG00000012273	Dmtn	S01	S02	1.59494	8.58903	2.429	5.71288	5e-05	0.0185	yes	upreguated	dematin actin binding protein [Source:RGD Symbol;Acc:1311419]	rno:361069
ENSRNOG00000047211	Fzd3	S01	S02	8.34098	2.08163	-2.0025	-4.99162	5e-05	0.0185	yes	downregulated	frizzled class receptor 3 [Source:RGD Symbol;Acc:628814]	rno:266715	GO:0016021, GO:0007186, GO:0003674, GO:0005575, GO:0004930, GO:0007420, GO:0042493, GO:0042813, GO:0060070, GO:0051602, GO:0017147, GO:0035567, GO:0036515, GO:0036514, GO:0045976, GO:0071679, GO:1904938, GO:0033278, GO:0042813, GO:1900118, GO:0061549, GO:0001764, GO:0032433, GO:0030901, GO:0016328, GO:0001736, GO:0048786, GO:0001942, GO:0045177, GO:0042472, GO:0036342, GO:0001843, GO:0016324, GO:…
ENSRNOG00000013658	Nefl	S01	S02	0.635541	73.3546	6.85076	13.6003	5e-05	0.0185	yes	upreguated	neurofilament, light polypeptide [Source:RGD Symbol;Acc:621458]	rno:83613	GO:0046982, GO:0019904, GO:1904115, GO:0043005, GO:0009636, GO:0030426, GO:0021766, GO:0030424, GO:0043434, GO:0021510, GO:0010033, GO:0021987, GO:0051412, GO:0043274, GO:0005883, GO:0051258, GO:0033693, GO:0045105, GO:1903937, GO:1903935, GO:0045110, GO:0040011, GO:0031133, GO:0014012, GO:0005883, GO:0060052, GO:0043209, GO:0050772, GO:0005200, GO:0043524, GO:0043005, GO:0050885, GO:0048812, GO:…
ENSRNOG00000013916	Nefm	S01	S02	2.69443	64.9858	4.59208	13.0313	5e-05	0.0185	yes	upreguated	neurofilament, medium polypeptide [Source:RGD Symbol;Acc:3160]	rno:24588	GO:0005198, GO:0061564, GO:0005883, GO:0005515, GO:0098779, GO:0097418
ENSRNOG00000014201	Manf	S01	S02	313.642	150.148	-1.06273	-3.74019	5e-05	0.0185	yes	downregulated	mesencephalic astrocyte-derived neurotrophic factor [Source:RGD Symbol;Acc:1307252]		GO:0003674, GO:0008150, GO:0005615, GO:0008083, GO:0005783, GO:0048471, GO:0006986
ENSRNOG00000014532	Lbp	S01	S02	4.2145	19.6987	2.22467	6.26737	5e-05	0.0185	yes	upreguated	lipopolysaccharide binding protein [Source:RGD Symbol;Acc:61865]	rno:29469	GO:0060265, GO:0002232, GO:0042535, GO:0001530, GO:0044130, GO:0050829, GO:0002281, GO:0090023, GO:0006953, GO:0032722, GO:0005102, GO:0032760, GO:0009986, GO:0045087, GO:0032496, GO:0071222, GO:0050830, GO:0005615, GO:0005515, GO:0070062, GO:0032720, GO:0031663, GO:0032755, GO:0032757, GO:0071223, GO:0043032, GO:0034145, GO:0070891, GO:0032490, GO:0015920
ENSRNOG00000015036	Ctgf	S01	S02	36.7403	97.372	1.40614	4.88849	5e-05	0.0185	yes	upreguated	connective tissue growth factor [Source:RGD Symbol;Acc:621392]		GO:0005576, GO:0001558, GO:0005520
ENSRNOG00000015260	Lpar3	S01	S02	5.35566	12.7668	1.25326	3.86727	0.00015	0.0460932	yes	upreguated	lysophosphatidic acid receptor 3 [Source:RGD Symbol;Acc:620565]	rno:66025	GO:0016021, GO:0007186, GO:0005886, GO:0005543, GO:0005543, GO:0070915, GO:0051928, GO:0001965, GO:0051482, GO:0032060, GO:0048672, GO:0000187, GO:0043410, GO:0030424, GO:0007186
ENSRNOG00000015902	Cpxm2	S01	S02	4.61876	14.7834	1.6784	4.85534	5e-05	0.0185	yes	upreguated	carboxypeptidase X (M14 family), member 2 [Source:RGD Symbol;Acc:1310955]		GO:0008270, GO:0005615, GO:0005615, GO:0031012
ENSRNOG00000016164	Fcrl2	S01	S02	11.9561	32.9507	1.46256	4.34183	0.0001	0.0329636	yes	upreguated	Fc receptor-like 2 [Source:RGD Symbol;Acc:1306885]	rno:310694	GO:0003674, GO:0005575, GO:0008150, GO:0016020, GO:0005044, GO:0006898
ENSRNOG00000017676	Plvap	S01	S02	19.0361	60.7307	1.67369	5.7304	5e-05	0.0185	yes	upreguated	plasmalemma vesicle associated protein [Source:RGD Symbol;Acc:619971]	rno:56765	GO:0016021, GO:0042803, GO:0005901, GO:0005901, GO:0048471, GO:0005515, GO:0070062, GO:0000165, GO:0033209, GO:0009986, GO:0005901, GO:0002693
ENSRNOG00000019050	Ifit1	S01	S02	0	1.18325	inf	nan	5e-05	0.0185	yes	upreguated	interferon-induced protein with tetratricopeptide repeats 1 [Source:RGD Symbol;Acc:620599]	rno:56824	GO:0051607, GO:0003723, GO:0071360, GO:0050688, GO:0071357, GO:0035457, GO:0009615, GO:0035458, GO:0005737, GO:0005515
ENSRNOG00000013062	Cyp24	S01	S02	4.4577	1.10613	-2.01078	-4.74973	5e-05	0.0185	yes	downregulated	cytochrome P450, family 24, [Source:RGD Symbol;Acc:2462]	rno:25279	GO:0005739, GO:0005506, GO:0020037, GO:0042359, GO:0042359, GO:0042369, GO:0008403, GO:0008403, GO:0030342, GO:0008403, GO:0042359, GO:0005739, GO:0055114, GO:0005886, GO:0005634, GO:0005654, GO:0033280, GO:0001649, GO:0030342
ENSRNOG00000021474	Siglec5	S01	S02	1.75002	10.5959	2.59807	6.06351	5e-05	0.0185	yes	upreguated	sialic acid binding Ig-like lectin 5 [Source:RGD Symbol;Acc:1305432]	rno:292843	GO:0016021, GO:0048029
ENSRNOG00000023400	Dtx3l	S01	S02	2.664	7.64547	1.52101	4.40894	5e-05	0.0185	yes	upreguated	deltex 3 like, E3 ubiquitin ligase [Source:RGD Symbol;Acc:1565144]	rno:498089	GO:0008270, GO:0005737, GO:0005634, GO:0004842, GO:0006974, GO:0005515, GO:0005654, GO:0042393, GO:0006302, GO:0010390
ENSRNOG00000031955	Calml3	S01	S02	0	1.36775	inf	nan	5e-05	0.0185	yes	upreguated	calmodulin-like 3 [Source:RGD Symbol;Acc:1305499]	rno:307100	GO:0003674, GO:0005575, GO:0008150, GO:0005509, GO:0005515, GO:0070062
ENSRNOG00000032327	Pdia5	S01	S02	8.034	20.2048	1.33051	3.92789	0.00015	0.0460932	yes	upreguated	protein disulfide isomerase family A, member 5 [Source:RGD Symbol;Acc:1359236]	rno:360722	GO:0005623, GO:0006457, GO:0005783, GO:0045454, GO:0005788, GO:0003756, GO:0034976, GO:0005515
ENSRNOG00000033110	Svep1	S01	S02	0.594462	2.01036	1.7578	4.54713	5e-05	0.0185	yes	upreguated	sushi, von Willebrand factor type A, EGF and pentraxin domain containing 1 [Source:RGD Symbol;Acc:1588987]		GO:0005509, GO:0005509, GO:0003682
ENSRNOG00000029773	Atm	S01	S02	3.24385	9.49271	1.54911	4.30324	0.0001	0.0329636	yes	upreguated	ATM serine/threonine kinase [Source:RGD Symbol;Acc:1593265]	rno:300711	GO:0005634, GO:0005737, GO:0005524, GO:0006281, GO:0006915, GO:0001666, GO:0016301, GO:0000723, GO:0051726, GO:0006974, GO:0016572, GO:0033129, GO:0043525, GO:1901216, GO:0045141, GO:0007292, GO:1904262, GO:0033151, GO:0002331, GO:0000077, GO:0032212, GO:0008630, GO:0042159, GO:0010506, GO:0010212, GO:0000724, GO:0043525, GO:0001756, GO:0048599, GO:0005819, GO:0007507, GO:0008340, GO:0007420, GO:…
ENSRNOG00000047746	AABR07000398.1	S01	S02	563.153	1752.38	1.63771	5.16462	5e-05	0.0185	yes	upreguated
ENSRNOG00000050210	RT1-CE10	S01	S02	12.6978	1.97158	-2.68716	-5.60288	5e-05	0.0185	yes	downregulated	RT1 class I, locus CE10 [Source:RGD Symbol;Acc:1359292]	rno:414792	GO:0006955, GO:0016021, GO:0005886, GO:0005102, GO:0002474, GO:0042605, GO:0042612
ENSRNOG00000051612	AABR07044570.1	S01	S02	0.660062	0	#NAME?	nan	5e-05	0.0185	yes	downregulated
ENSRNOG00000054945	LOC257642	S01	S02	0	53.6843	inf	nan	5e-05	0.0185	yes	upreguated	rRNA promoter binding protein [Source:RGD Symbol;Acc:727924]		GO:0016021, GO:0006355, GO:0008134, GO:0003700, GO:0008283, GO:0003690, GO:0009303
ENSRNOG00000054957	Sfrp4	S01	S02	11.4412	28.8339	1.33353	4.33881	5e-05	0.0185	yes	upreguated	secreted frizzled-related protein 4 [Source:RGD Symbol;Acc:621075]	rno:89803	GO:0007275, GO:0016055, GO:0005737, GO:0005634, GO:0005615, GO:0005515, GO:0010628, GO:0090090, GO:0017147, GO:0090263, GO:0009986, GO:0008285, GO:0043065, GO:0043433, GO:0098779, GO:0002092, GO:1902174, GO:0045606, GO:0055062, GO:2000119
ENSRNOG00000056810	AABR07037536.1	S01	S02	0.536326	0	#NAME?	nan	5e-05	0.0185	yes	downregulated			GO:0005622, GO:0048015, GO:0046854, GO:0016301
ENSRNOG00000057451	Itga5	S01	S02	8.7854	30.4765	1.79452	6.16466	5e-05	0.0185	yes	upreguated	integrin subunit alpha 5 [Source:RGD Symbol;Acc:2925]	rno:315346	GO:0016021, GO:0005737, GO:0005615, GO:0004872, GO:0007229, GO:0030335, GO:0007155, GO:0050839, GO:0008305, GO:0005154, GO:0005178, GO:0010811, GO:0033631, GO:0007159, GO:0045765, GO:0007044, GO:0007157, GO:0005178, GO:0007613, GO:0045202, GO:0009986, GO:0005783, GO:0031410, GO:0009897, GO:0005886, GO:0005794, GO:0005515, GO:0005925, GO:0005911, GO:0050731, GO:1903672, GO:0031589, GO:0032587, GO:…
ENSRNOG00000058003	Spon1	S01	S02	3.81799	14.9645	1.97066	6.0543	5e-05	0.0185	yes	upreguated	spondin 1 [Source:RGD Symbol;Acc:619918]	rno:64456	GO:0005615, GO:0005515, GO:0031012
ENSRNOG00000060518	LOC257642	S01	S02	611.363	1516.39	1.31054	4.25173	0.0001	0.0329636	yes	upreguated	rRNA promoter binding protein [Source:RGD Symbol;Acc:727924]		GO:0016021, GO:0006355, GO:0008134, GO:0003700, GO:0008283, GO:0003690, GO:0009303, GO:0016021, GO:0006355, GO:0008134, GO:0003700, GO:0008283, GO:0003690, GO:0009303, GO:0006355, GO:0008134, GO:0003700, GO:0008283, GO:0003690, GO:0009303
ENSRNOG00000006450	Erbb2	S01	S02	13.1767	11.4379	-0.204168	-0.686806	0.4803	0.998884	no	non	erb-b2 receptor tyrosine kinase 2 [Source:RGD Symbol;Acc:2561]	rno:24337	GO:0016021, GO:0005524, GO:0023014, GO:0018108, GO:0004714, GO:0004716, GO:0007169, GO:0033088, GO:0042552, GO:0007422, GO:0043209, GO:0008045, GO:0048709, GO:0007528, GO:0007507, GO:0016324, GO:0010628, GO:0001934, GO:0043547, GO:0007399, GO:0031410, GO:0005737, GO:0005886, GO:0005515
ENSRNOG00000004964	Erbb3	S01	S02	140.483	111.421	-0.334384	-1.12295	0.2569	0.998884	no	non	erb-b2 receptor tyrosine kinase 3 [Source:RGD Symbol;Acc:69323]	rno:29496	GO:0016021, GO:0005524, GO:0023014, GO:0018108, GO:0004714, GO:0004716, GO:0007169, GO:0055025, GO:0014037, GO:0070886, GO:0007422, GO:0003197, GO:0016328, GO:0021545, GO:0043524, GO:0016324, GO:0010628, GO:0005515, GO:0005615, GO:0046982, GO:0042802, GO:0007165, GO:0043235, GO:0016323, GO:0042127, GO:0014065, GO:0007162, GO:0019838, GO:0009968, GO:0051402, GO:0061098, GO:0051048, GO:0038132, GO:…
ENSRNOG00000010153	Raf1	S01	S02	33.8944	33.7974	-0.00413606	-0.0130676	0.9902	0.998884	no	non	Raf-1 proto-oncogene, serine/threonine kinase [Source:RGD Symbol;Acc:3531]	rno:24703	GO:0005634, GO:0005737, GO:0005524, GO:0005524, GO:0006468, GO:0006468, GO:0006468, GO:0006468, GO:0046872, GO:0005515, GO:0046982, GO:0035556, GO:0035556, GO:0005886, GO:0005829, GO:0007264, GO:0005739, GO:0001666, GO:0005057, GO:0000165, GO:0000165, GO:0000186, GO:0004709, GO:0004709, GO:0004709, GO:0007507, GO:0031434, GO:0071550, GO:0048011, GO:0048538, GO:0001678, GO:0035773, GO:0045104, GO:…
XLOC_004359	-	S01	S02	0	0.529992	inf	nan	0.0001	0.0329636	yes	upreguated	---NA---
XLOC_006370	-	S01	S02	2.07431	0	#NAME?	nan	5e-05	0.0185	yes	downregulated	isoform cra_a
XLOC_006878	-	S01	S02	0.59715	0	#NAME?	nan	5e-05	0.0185	yes	downregulated	low quality protein: uncharacterized protein loc103592841
XLOC_010664	-	S01	S02	0	23.6777	inf	nan	5e-05	0.0185	yes	upreguated	atp-binding cassette sub-family g member 3-like		GO:0042626, GO:0015238, GO:0005886, GO:0006855, GO:0005524, GO:0016021
XLOC_011203	-	S01	S02	0	9.80126	inf	nan	0.00015	0.0460932	yes	upreguated	atp-binding subfamily g member 3-like 2
XLOC_015599	-	S01	S02	2.73323	0	#NAME?	nan	5e-05	0.0185	yes	downregulated	40s ribosomal protein s16	K02960	GO:0005925, GO:0000184, GO:0006415, GO:0006413, GO:0005515, GO:0016020, GO:0044822, GO:0016259, GO:0006414, GO:0000462, GO:0003735, GO:0019083, GO:0006614, GO:0070062, GO:0022627
XLOC_018814	-	S01	S02	12.0351	0	#NAME?	nan	5e-05	0.0185	yes	downregulated	pol protein		GO:0008233, GO:0016779, GO:0090305, GO:0006259, GO:0004519, GO:0046872, GO:0019058, GO:0044423
XLOC_018815	-	S01	S02	38.2797	0	#NAME?	nan	5e-05	0.0185	yes	downregulated	low quality protein: uncharacterized protein partial
XLOC_018943	-	S01	S02	0	0.701544	inf	nan	5e-05	0.0185	yes	upreguated	---NA---
XLOC_019422	-	S01	S02	1.56274	0	#NAME?	nan	5e-05	0.0185	yes	downregulated	---NA---
XLOC_027131	-	S01	S02	35.3396	0	#NAME?	nan	5e-05	0.0185	yes	downregulated	---NA---
XLOC_030745	-	S01	S02	30.7339	0	#NAME?	nan	5e-05	0.0185	yes	downregulated	envelope protein		GO:0016021, GO:0005198, GO:0019058, GO:0019031, GO:0019028
XLOC_030929	-	S01	S02	28.6257	0	#NAME?	nan	5e-05	0.0185	yes	downregulated	uncharacterized protein loc102551365
